# Supplementary material for: Monitoring wind and particle concentrations near freshwater and marine harmful algal blooms (HABs)
Source: Royal Society of Chemistry journal article supplement (doi:10.1039/d4va00172a), 2024-11-22
Supplement: d4va00172a1.pdf [file d4va00172a1.pdf]

**Supplementary Table 1.** Cell counts for potentially toxigenic cyanobacteria as reported by the Virginia Department of Health (VDH) for 2019 and 2020 at Lake Anna, VA. Sample collection sites are indicated on the VDH HAB map (<https://www.vdh.virginia.gov/waterborne-hazards-control/algal-bloom-surveillance-map/>). The Virginia Department of Environmental Quality (DEQ) collected the samples from Lake Anna, and cyanobacteria counts were performed at the Phytoplankton Lab at Old Dominion University (ODU).

| <b>Genus</b>             | <b>Reported Cell Counts, 2019</b> | <b>Reported Cell Counts, 2020</b> |
|--------------------------|-----------------------------------|-----------------------------------|
| <i>Anabaena</i>          | 12,528                            | 23,380                            |
| <i>Anabaenopsis</i>      | 4,576                             | 29,050                            |
| <i>Aphanizomenon</i>     | 193,840                           | 151,270                           |
| <i>Arthrospira</i>       | 37,669                            | 0                                 |
| <i>Chrysoosporum</i>     | 505,813                           | 262,080                           |
| <i>Cuspidothrix</i>      | 1,323,760                         | 46,920                            |
| <i>Dolichospermum</i>    | 122,692                           | 53,490                            |
| <i>Jaaginema</i>         | 7,137,168                         | 14,000                            |
| <i>Limnothrix</i>        | 1,520                             | 21,140                            |
| <i>Microcystis</i>       | 34,267                            | 1,230                             |
| <i>Nostocalean</i>       | 0                                 | 16,170                            |
| <i>Phormidium</i>        | 105,112                           | 0                                 |
| <i>Planktolyngbya</i>    | 979,394                           | 270,200                           |
| <i>Planktothrix</i>      | 0                                 | 13,300                            |
| <i>Pseudanabaena</i>     | 4,747,513                         | 805,051                           |
| <i>Raphidiopsis</i>      | 8,449,792                         | 2,339,584                         |
| <i>Sphaerospermopsis</i> | 0                                 | 2,350                             |
