# Supplementary material for: Monitoring wind and particle concentrations near freshwater and marine harmful algal blooms (HABs)
Source: Royal Society of Chemistry journal article supplement (doi:10.1039/d4va00172a), 2024-11-22
Supplement: d4va00172a2.pdf [file d4va00172a2.pdf]

**Supplementary Table 2.** Cell counts for potentially toxigenic cyanobacteria as reported by VDH for collection year 2020. Percentage of each taxon is listed for Zone 2 and Zone 4, as a reference for data collected on July 7 and July 8, respectively.

| <b>Cyanobacteria</b>     | <b>2020</b> | <b>% in Zone 2</b> | <b>% in Zone 4</b> |
|--------------------------|-------------|--------------------|--------------------|
| <i>Anabaena</i>          | 23,380      | 15.48%             | 71.86%             |
| <i>Anabaenopsis</i>      | 29,050      | 67.71%             | 30.50%             |
| <i>Aphanizomenon</i>     | 151,270     | 0.89%              | 29.70%             |
| <i>Chrysochloris</i>     | 262,080     | 33.76%             | 31.32%             |
| <i>Cuspidothrix</i>      | 46,920      | 25.96%             | 17.14%             |
| <i>Dolichospermum</i>    | 53,490      | 1.44%              | 4.23%              |
| <i>Jaaginema</i>         | 14,000      | 0.00%              | 61.79%             |
| <i>Limnothrix</i>        | 21,140      | 0.00%              | 4.07%              |
| <i>Microcystis</i>       | 1,230       | 0.00%              | 13.01%             |
| <i>Nostocalean</i>       | 16,170      | 0.00%              | 28.32%             |
| <i>Planktolyngbya</i>    | 270,200     | 10.32%             | 48.45%             |
| <i>Planktothrix</i>      | 13,300      | 0.00%              | 35.34%             |
| <i>Pseudanabaena</i>     | 805,051     | 20.39%             | 34.97%             |
| <i>Raphidiopsis</i>      | 2,339,584   | 5.20%              | 22.15%             |
| <i>Sphaerospermopsis</i> | 2,350       | 0.00%              | 0.00%              |
