# Supplementary material for: Monitoring wind and particle concentrations near freshwater and marine harmful algal blooms (HABs)
Source: Royal Society of Chemistry journal article supplement (doi:10.1039/d4va00172a), 2024-11-22
Supplement: d4va00172a6.pdf [file d4va00172a6.pdf]

**Supplementary Table 3.** Red tide data for samples collected in December 2019 near Manasota Key and Seagate beaches in Florida. Data extracted from the Beach Conditions Reporting System (BCRS) through Mote Marine Laboratory (<https://visitbeaches.org/>). BCRS Beach Ambassador Reports are submitted by trained volunteers.

| Beach Name   | Date    | Time (ET) | Lat.     | Long.     | [ <i>K. brevis</i> ] (cells/L) | Depth (m) | Distance to beach (km) |
|--------------|---------|-----------|----------|-----------|--------------------------------|-----------|------------------------|
| Manasota Key | 12/4/19 | 12:00 PM  | 27.01767 | -82.41496 | 0                              | 0.5       | 0.9                    |
| Manasota Key | 12/4/19 | 12:00 PM  | 26.99658 | -82.40285 | 0                              | 0.5       | 1.8                    |
| Manasota Key | 12/4/19 | 12:00 PM  | 27.04021 | -82.42914 | 0                              | 0.5       | 3.7                    |
| Manasota Key | 12/4/19 | 12:00 PM  | 26.98155 | -82.38897 | 1500                           | 0.5       | 3.9                    |
| Manasota Key | 12/4/19 | 12:00 PM  | 26.95008 | -82.36454 | 5500                           | 0.5       | 8.2                    |
| Manasota Key | 12/4/19 | 12:00 PM  | 26.95008 | -82.36454 | 8500                           | 0.5       | 8.2                    |
| Manasota Key | 12/4/19 | 12:00 PM  | 27.0871  | -82.4319  | 0                              | 0.5       | 8.8                    |
| Manasota Key | 12/4/19 | 7:51 AM   | 26.92467 | -82.36189 | 333                            | 0.5       | 10.7                   |
| Manasota Key | 12/4/19 | 12:00 PM  | 27.112   | -82.4502  | 0                              | 0.5       | 11.9                   |
| Manasota Key | 12/4/19 | 12:00 PM  | 27.1154  | -82.4534  | 0                              | 0.5       | 12.4                   |
| Manasota Key | 12/4/19 | 12:00 PM  | 27.12    | -82.4645  | 0                              | 0.5       | 13.2                   |
| Manasota Key | 12/4/19 | 12:00 PM  | 27.1226  | -82.4686  | 0                              | 0.5       | 13.7                   |
| Manasota Key | 12/4/19 | 12:00 PM  | 27.13274 | -82.46941 | 0                              | 0.5       | 14.7                   |
| Manasota Key | 12/4/19 | 12:00 PM  | 27.14054 | -82.47178 | 0                              | 0.5       | 15.6                   |
| Manasota Key | 12/4/19 | 12:00 PM  | 27.15243 | -82.4785  | 0                              | 0.5       | 17.1                   |
| Manasota Key | 12/4/19 | 12:00 PM  | 27.16442 | -82.48579 | 0                              | 0.5       | 18.6                   |
| Manasota Key | 12/4/19 | 12:00 PM  | 27.16986 | -82.48801 | 0                              | 0.5       | 19.2                   |
| Seagate      | 12/3/19 | 9:49 AM   | 26.1864  | -81.8155  | 8667                           | 0.5       | 2.3                    |
| Seagate      | 12/3/19 | 9:02 AM   | 26.25375 | -81.82377 | 667                            | 0.5       | 5.2                    |
| Seagate      | 12/3/19 | 10:20 AM  | 26.13163 | -81.8063  | 0                              | 0.5       | 8.5                    |
| Seagate      | 12/3/19 | 8:21 AM   | 26.30481 | -81.8362  | 0                              | 0.5       | 11.0                   |
