# Supplementary figures and images for: Monitoring wind and particle concentrations near freshwater and marine harmful algal blooms (HABs)
Source: Royal Society of Chemistry journal article supplement (doi:10.1039/d4va00172a), 2024-11-22

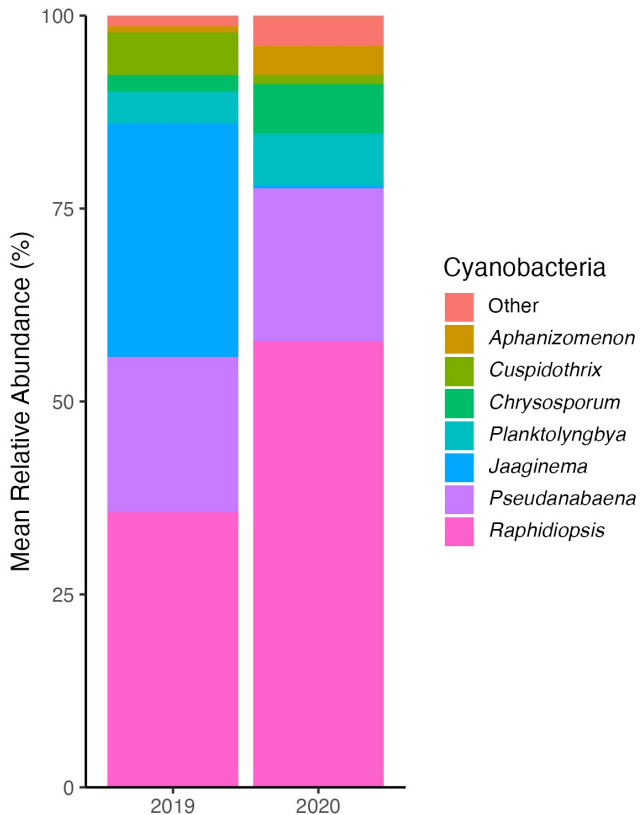

Supplement: d4va00172a3.pdf [file d4va00172a3.pdf]

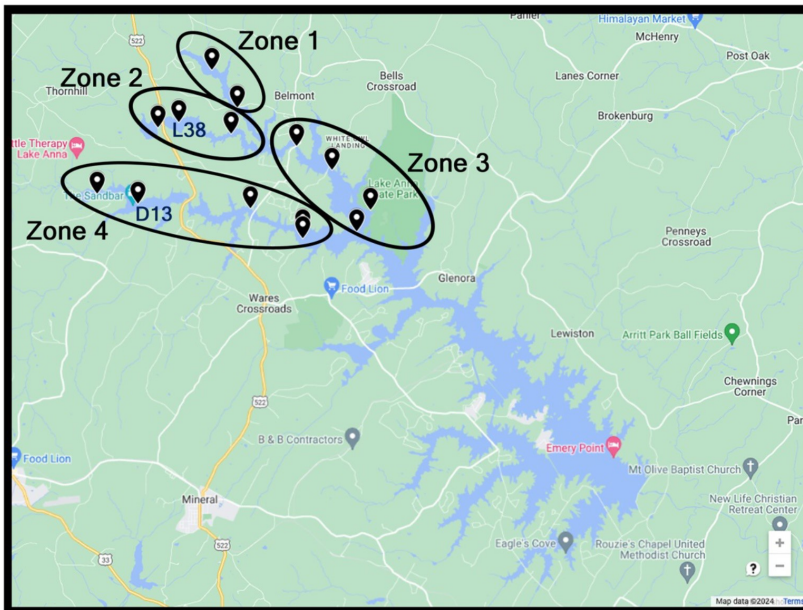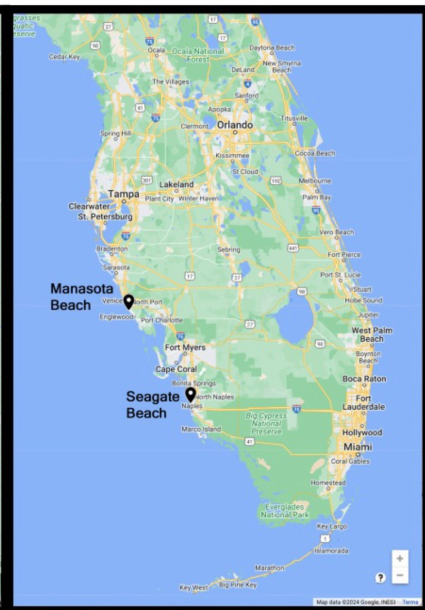

Supplement: d4va00172a4.pdf [file d4va00172a4.pdf]

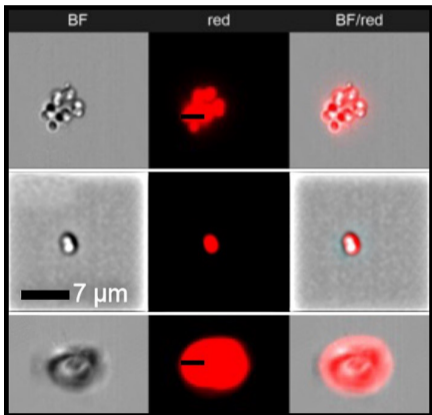

Supplement: d4va00172a5.pdf [file d4va00172a5.pdf]
